Results: In all patients US examination depicted thickened, hypochoic ileal wall showing patterns of vascularization. In 8 patients Bauhin' valve edema was visible. In 16 children, inflammatory infiltration of the perintestinal fat around the affected segment of the intestine was found. In addition, all patients presented mesenteric lymphadenopathy with short-axis diameter of 10–15 mm. 8 patients had penetrating complications of Crohn's disease: 4 small intestine fistulas and 4 abscesses.

Conclusion: Given its safety profile and diagnostic efficacy, US examination should be considered as the first-line imaging modality for assessing inflammatory bowel disease in children. US proved to be a reliable and easily accessible tool in the diagnosis of enteric inflammatory lesions, evaluating CD activity and assessing potential penetrating complications of the disease.

#### WEARABLE SWEAT SENSING DEVICE FOR DETECTION OF IBD BIOMARKERS

Badrinath Jagannath, Sriram Muthukumar, Shalini Prasad

Introduction: Inflammatory Bowel Disease affects 1.2 million in the United States. Flare-up of the disease occurs in a random way and current testing methods lack ability for real-time prediction of a flare up. The levels of cytokines elevate during a flareup. Therefore, we hypothesize that real-time monitoring of cytokine biomarkers can be useful for early detection of flare-ups and provide better patient management. In this context, sweat-based diagnostics can be promising for real-time tracking of IBD biomarkers.

Materials and Methods: A wearable SWEATSENER was developed by functionalization of specific affinity capture probes (IL-1 $\beta$ , CRP antibodies) on metal/semi-conducting interface deposited on a porous patch substrate. Electrochemical impedance spectroscopy technique was used to detect the interaction between the specific antibody and target analyte. The developed SWEATSENER was tested on 20 healthy human subjects in compliance with an approved IRB at UT Dallas. Continuous on-body measurements were recorded to report IL-1 $\beta$ , CRP levels in sweat in real-time.

Results: In this work, a wearable multiplexed sweat sensor for detection of IL-1 $\beta$ , CRP in sweat has been demonstrated. The sensor demonstrates a limit of detection of 1 pg/mL with a dynamic range from 1 pg/mL–512 pg/mL for both the biomarkers in sweat. The sweat sensor demonstrated excellent correlation with reference ELISA method (Pearson's  $r \geq 0.95$ ). On-body monitoring using sweat sensor from passively perspired human sweat demonstrated a mean concentration of 28 pg/mL for IL-1 $\beta$  in healthy cohort.

Conclusion: A wearable sweat sensor was developed to monitor potential IBD markers in sweat. The developed device can be useful in better management of IBD patients.

Detection of IBD Related Markers, IL-1 $\beta$  and CRP in Eccrine Sweat

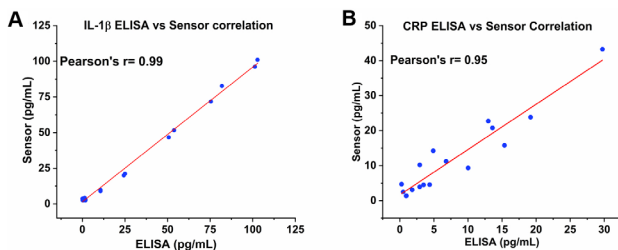

## Disease Activity Assessment

#### COLLABORATIVE DEVELOPMENT OF CROHN'S DISEASE CLINICAL DATA STANDARDS BY STANDARDS DEVELOPMENT AND CROHN'S DISEASE EXPERTS TO FOSTER DATA REVIEW, SHARING, AND REUSE

John Owen, Rebecca Baker

Background: The ability to access expansive collections of well-curated biological, clinical, and behavioral data will propel scientific progress and enable the discoveries needed to improve treatments for human disease. Development and adoption of standards transform incompatible and disparate data into universal and illuminating information, facilitating discoveries that could have invaluable impact on Crohn's disease clinical research. When standards are applied, data is

collected, organized, and analyzed in a clear and consistent manner, allowing all researchers to leverage information from studies around the world.

Required by the United States Food and Drug Administration (FDA) and Japan's Pharmaceuticals and Medical Devices Agency (PMDA) and adopted by the world's leading research organizations, CDISC standards enable the accessibility, interoperability, and reusability of data. CDISC standards addresses each step of the clinical research process to drive operational efficiencies within the organizations that use them, expedite the regulatory review process and reduce time to market.

Methods: With support from The Leona M. and Harry B. Helmsley Charitable Trust, CDISC formed a team of standards development and Crohn's disease experts to follow our consensus-based, clinical data standards process, which consists of six stages:

**Scoping** – Identification of development topics

**Concept Modeling** – Deep dive understanding of topics

**Standards Development** – Development of standards content

**Internal Review** – Targeted review

**Public Review** – User community review

**Publication** – Freely available on the CDISC website

Results: The project Standards Development and Internal Review stages completed in September 2020, resulting in the following topics available for the Public Review stage.

- Questionnaires, Ratings and Scales (including standard symptom measures, patient/investigator reported outcomes, and socio-economic measures)
- Prior and Baseline, and On-Study Treatments (including response to prior treatment)
- Disease Staging (location and phenotypic descriptions of the disease)
- Endoscopy Assessments
- Cross-section Imaging Assessments (including CT, MRI and Ultrasound)
- Histopathology of Biopsy Samples
- Biomarkers of Interest for Crohn's Disease

Conclusion: To make the greatest impact on Crohn's disease research, widespread promotion of the availability of the standards for researchers to adopt and implement to their data is of highest importance. CDISC provides complementary education courses and implementation information to assist in this adoption. Widespread adoption of the standards will bring clarity to Crohn's disease data and will enable the accessibility, interoperability, and reusability of data, driving operational efficiencies, expediting regulatory review, and reducing time to market.

#### DISEASE ACTIVITY, STEROID-FREE REMISSION, AND CLINICAL OUTCOME ASSESSMENTS OF PEDIATRIC ULCERATIVE COLITIS AND CROHN'S DISEASE PATIENTS RECEIVING BIOLOGIC THERAPY

Theresa Hunter, Wendy Komocsar, Chunyan Liu, Richard Colletti, Steven Steiner, Jennifer Dotson, Keith Benkov, Nanhua Zhang, Wallace Crandall

Objectives: To assess disease activity, steroid-free remission, and clinical outcome assessments among pediatric UC and CD patients who initiated a biologic after being enrolled in the ICN registry.

Methods: Pediatric patients who were diagnosed with UC or CD between June 1, 2013–Dec 31, 2019, who, after enrollment in the ICN registry, initiated a biologic and were actively followed for at least 12 months after first maintenance dose were included in this study. Descriptive statistics of baseline patient demographics were summarized for the overall IBD patient population and separately for UC and CD. PUCAI, partial Mayo score, and PGA were assessed in UC patients; and the sPCDAI and PGA were assessed in CD patients at first maintenance dose, 1-year and 3-year time points. Kappa coefficients were used to assess the level of agreement between the PUCAI, Mayo clinical score, and PGA for UC patients and the level of agreement between the sPCDAI and PGA for CD patients at different time points.

Results: A total of 1,887 pediatric IBD patients (UC=350; CD=1,537) were included in this study. Patients had a mean age at diagnosis of 12.9 years, 57.1% were male, and 80.6% were White. Mean PUCAI scores of UC patients decreased from 12.1 at first maintenance dose, to 5.7 at 1-year, and 3.7 at 3-years; the proportion of UC patients in steroid-free remission by PUCAI increased from 46.2% at first maintenance dose, to 75.0% at 1 year and 80.4% at 3 years. The proportion of UC patients that were quiescent based on PGA also increased from 67.2% at first maintenance dose, to 84.2% at 1-year and 92.6% at 3-years. The proportion of UC patients that were in remission based on Partial Mayo score also increased from 72.1% at first maintenance dose, to 87.5% at 1-year and 92.3% at 3-years. Mean sPCDAI score of CD patients decreased from 9.5 at first maintenance dose, to 6.7 at 1-year, and 6.3 at 3-years; the proportion of CD patients in steroid-free remission by sPCDAI increased from 63.8% at first maintenance dose, to 81.2% at 1-year and 85.4% at 3-years. The proportion of CD patients who were quiescent based on PGA also increased from 69.2% at first maintenance dose, to 85.3% at 1-year and 89.6% at 3-years. In UC patients, the kappa coefficients between PUCAI and PGA ranged from 0.46–0.66, PUCAI and partial Mayo ranged from 0.52–0.72, and PGA and
